# Supplementary figures and images for: Acceptability, Feasibility, and Utility of Integrating Pharmacogenetic Testing into a Child Psychiatry Clinic
Source: PubMed Central journal article supplement — Clin Transl Sci. 2020 Nov 9;14(2):589–98. doi: 10.1111/cts.12914 (PMC7993320; doi:10.1111/cts.12914), 2020-11-09

ASEC scores over time across study arms

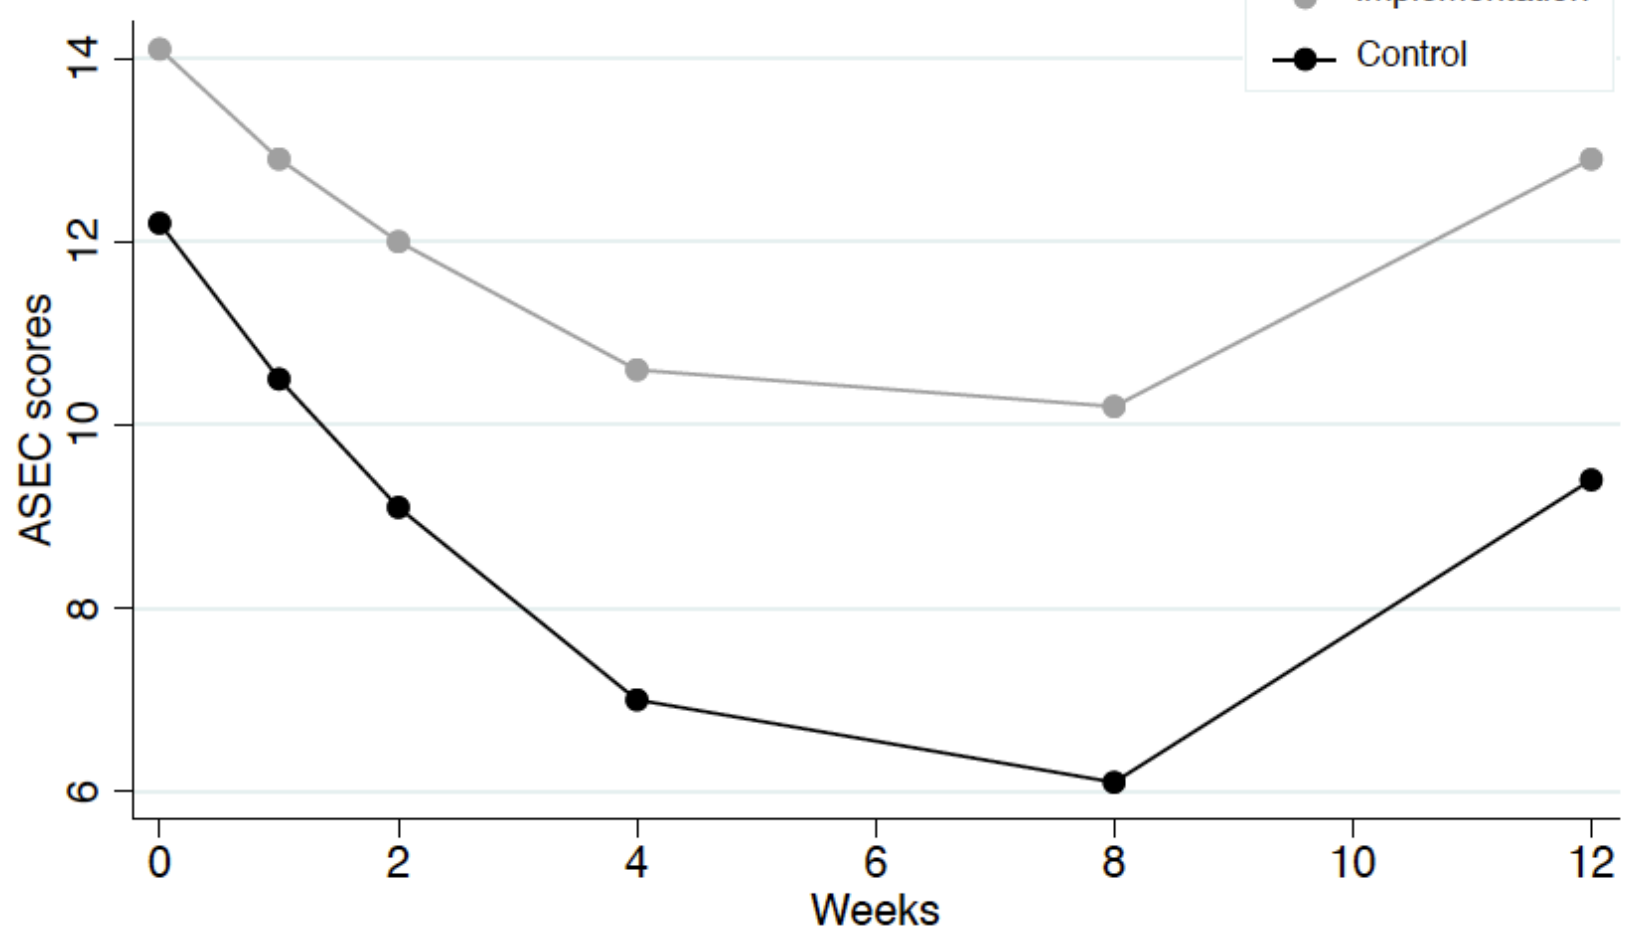

CIS scores over time across study arms

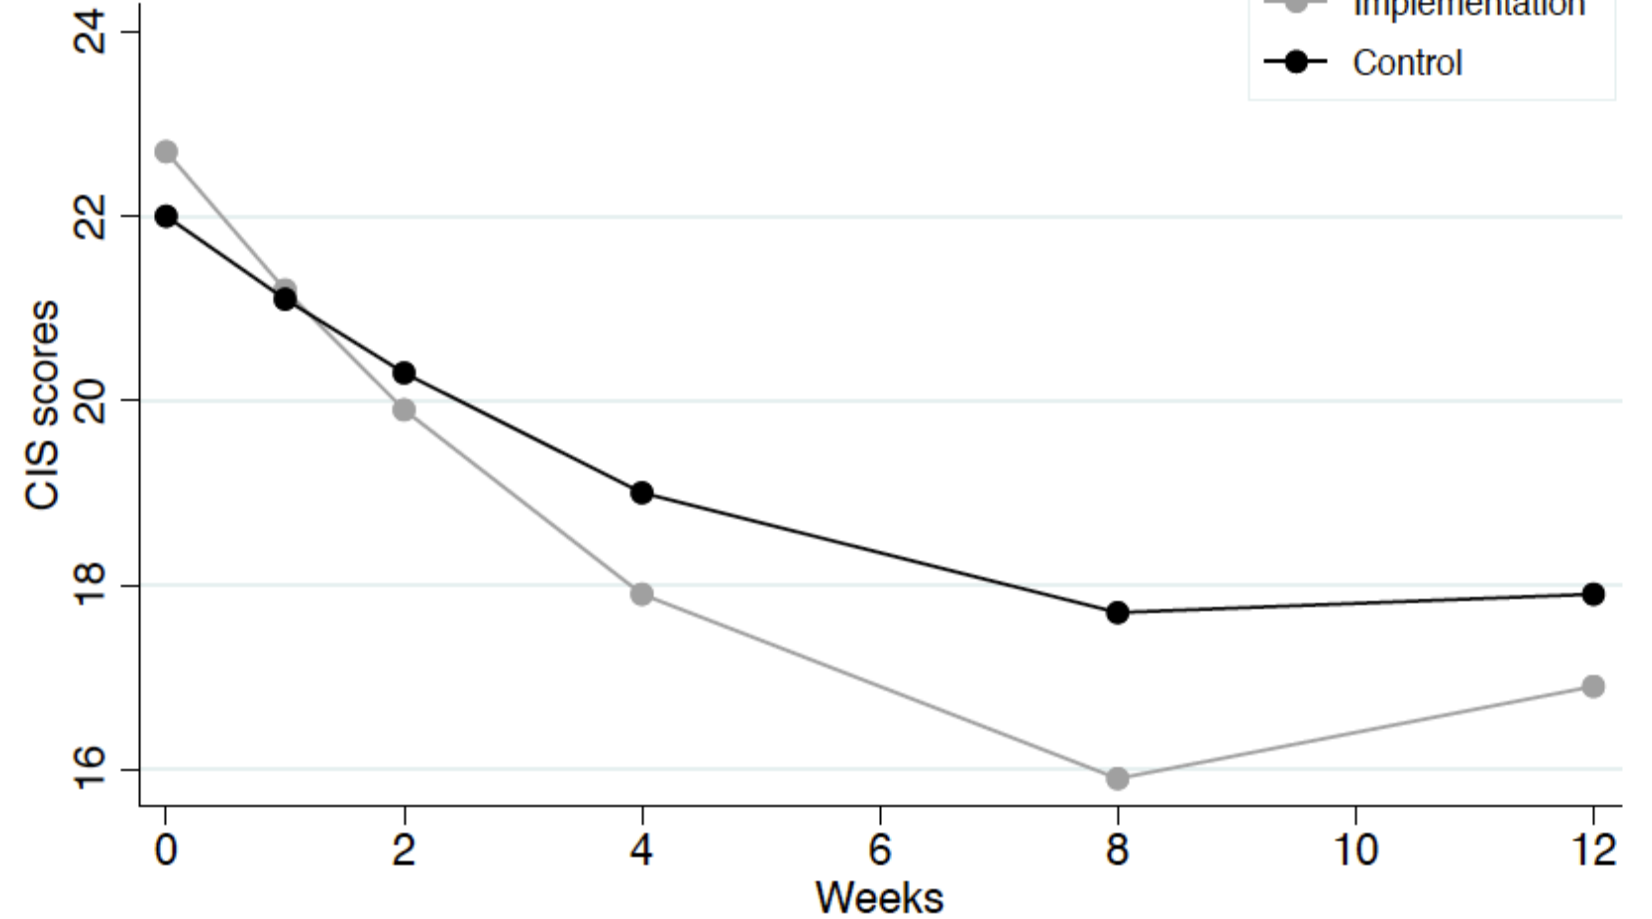

Supplement: CTS-14-589-s001.pdf [file CTS-14-589-s001.pdf]
